# Supplementary material for: Formation of EGFRwt/EGFRvIII homo- and hetero-dimers in glioblastoma cells as detected by single molecule localization microscopy
Source: Royal Society of Chemistry journal article supplement (doi:10.1039/d4nr01570c), 2024-01-01
Supplement: d4nr01570c1.pdf [file d4nr01570c1.pdf]

**Supplement:**

Table S1: Mean localization precision for the point measurements of the blinking events of the secondary antibodies

| sample  | primary antibody | Mean localization precision |
|---------|------------------|-----------------------------|
| slide 1 | wt               | 11.00 ± 0.10                |
|         | vIII             | 8.77 ± 0.13                 |
| control | wt               | 11.22 ± 0.15                |
|         | vIII             | 10.71 ± 0.07                |
| slide 5 | wt               | 11.21 ± 0.08                |
|         | vIII             | 9.50 ± 0.07                 |

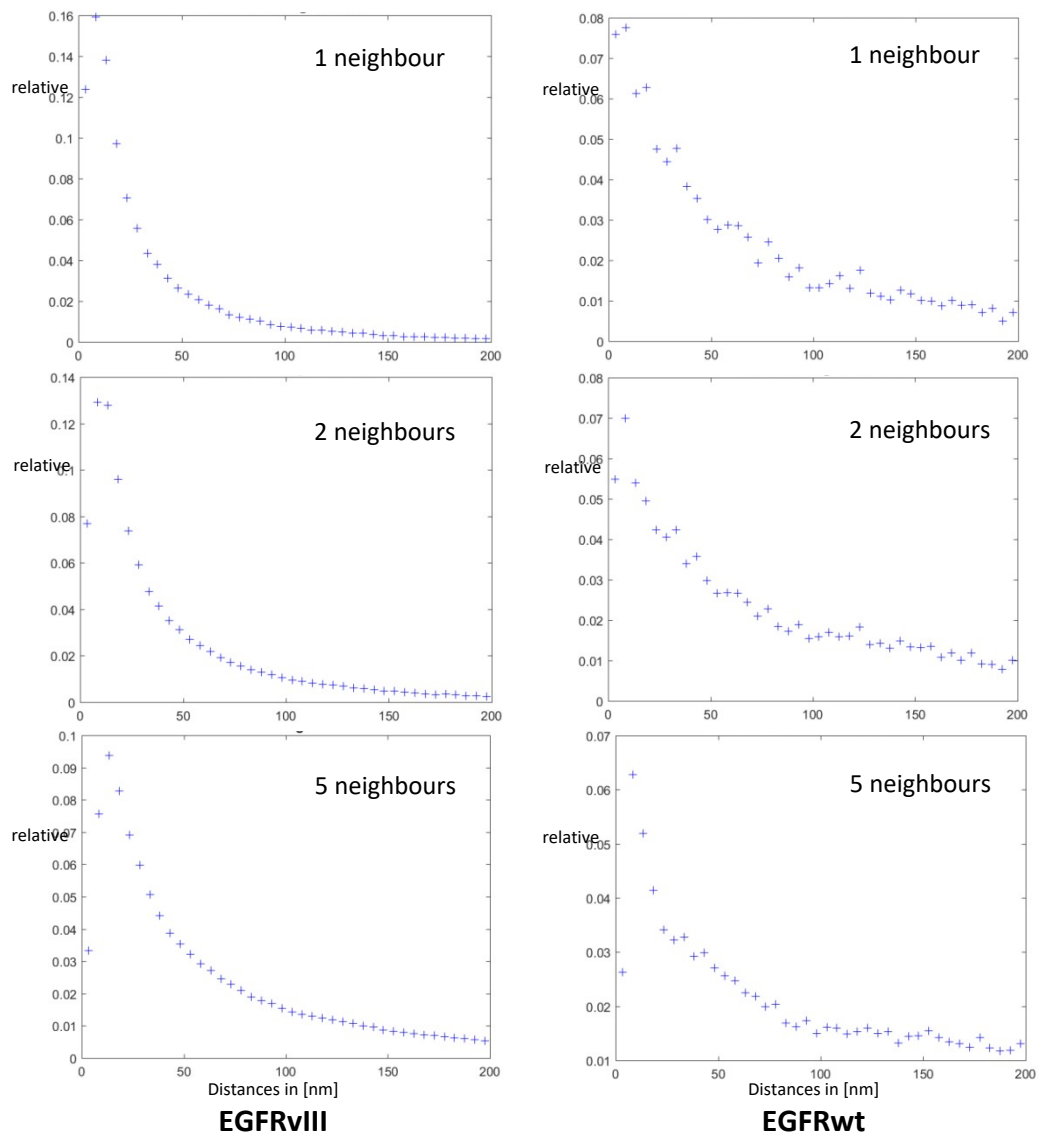

Supplementary Figure 1: relative frequencies of next neighbour distances for one colour measurements for EGFRvIII (left) and EGFRwt (right). The curves show the frequencies for the distances for the next neighbour, for the two next neighbours and for the five next neighbours and indicate a very similar behaviour
